# Supplementary material
Source: Research Square preprint supplement (doi:10.21203/rs.3.rs-11510/v2)

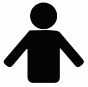

# Zoos & Sanctuaries Module

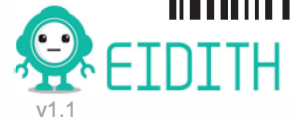

|    |    |    |    |    |    |    |    |    |    |
|----|----|----|----|----|----|----|----|----|----|
| 01 | 01 | 02 | 03 | 04 | 05 | 06 | 07 | 08 | 09 |
| 01 | 01 | 02 | 03 | 04 | 05 | 06 | 07 | 08 | 09 |
| 01 | 01 | 02 | 03 | 04 | 05 | 06 | 07 | 08 | 09 |
| 01 | 01 | 02 | 03 | 04 | 05 | 06 | 07 | 08 | 09 |
| 01 | 01 | 02 | 03 | 04 | 05 | 06 | 07 | 08 | 09 |
| 01 | 01 | 02 | 03 | 04 | 05 | 06 | 07 | 08 | 09 |

Add Human Questionnaire Form ID

Participant ID

(For reference only)

- Do you live on site?
  - yes
  - no
- To the best of your knowledge, how many people work at this site? Select one option.
  - <10
  - 11-50
  - 51-100
  - 101-1000
  - >1001
- How long have you worked here? Select one option.
  - <1 month
  - 1 month - 1 year
  - >1 year - 5 years
  - >5 years
- What species do you work with? Select all that apply.
  - rodents/shrews
  - bats
  - non-human primates
  - birds
  - carnivores
  - ungulates
  - pangolins
  - poultry/other fowl
  - goats/sheep
  - camels
  - swine
  - cattle/buffalo
  - dogs
  - cats
  - none If "none" selected, skip to question 8

- Do you have special protective equipment (Example: shoes, masks, gloves) only worn at work?
  - yes
  - no

- If yes, which protective equipment? Select all that apply.
  - shoes/boots
  - mask
  - clothes
  - gloves
  - gown/apron

- When do you use protective equipment? Select all that apply.
  - handling animals
  - slaughter
  - butcher
  - always on at work
  - other: \_\_\_\_\_

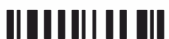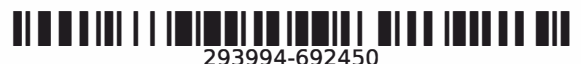

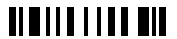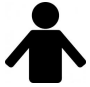

# Zoos & Sanctuaries Module

Participant ID

(For reference only)

8. Do you always use disinfectant to clean?  yes  no

9. If yes, do you always use disinfectants to clean the following:  
Select all that apply.

- animal enclosures
- food bins
- counter tops
- slaughtering/butchering equipment
- hands
- special protective equipment
- floors

10. How often are the animal enclosures cleaned?  
Select one option.

- daily
- weekly
- monthly
- as needed
- never

11. Is there a designated area for the disposal of animal waste?  yes  no

12. If yes, do people use the dedicated area for animal waste?  yes  no

13. Is there a quarantine period for new animals?  yes  no

14. Is there a preventative medicine program for the animals?  yes  no

15. Do any animals raid food or destroy supplies?  yes  no

16. If yes, which animals?  
Select all that apply.

- |                                          |                                          |
|------------------------------------------|------------------------------------------|
| <input type="radio"/> rodents/shrews     | <input type="radio"/> poultry/other fowl |
| <input type="radio"/> bats               | <input type="radio"/> goats/sheep        |
| <input type="radio"/> non-human primates | <input type="radio"/> camels             |
| <input type="radio"/> birds              | <input type="radio"/> swine              |
| <input type="radio"/> carnivores         | <input type="radio"/> cattle/buffalo     |
| <input type="radio"/> ungulates          | <input type="radio"/> dogs               |
| <input type="radio"/> pangolins          | <input type="radio"/> cats               |

17. What is done to stop animals from raiding or destroying food supplies?  
Select all that apply.

- barriers around fields
- barriers on individual trees
- fire
- poison
- traps
- shooting
- loud sounds
- domestic/guardian animals
- flooding
- chasing animals out
- nothing

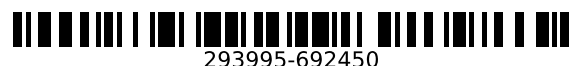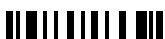

Supplement: Supplementary file 1 [file 43ae29744497798f772f981b.pdf]
