# Supplementary material
Source: Research Square preprint supplement (doi:10.21203/rs.3.rs-11510/v2)

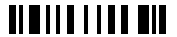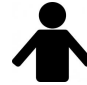

10. Is there a designated area for rubbish, including animal waste from slaughter/butcher and animal excrement?

- yes
- no

11. If yes, do people use the designated location for rubbish?

- yes
- no

12. Do any animals raid food supplies or destroy crops?

- yes
- no

13. If yes, which animals?  
Select all that apply.

- rodents/shrews
- bats
- non-human primates
- birds
- carnivores
- ungulates
- pangolins
- poultry/other fowl
- goats/sheep
- camels
- swine
- cattle/buffalo
- dogs
- cats

14. What is done to stop animals from raiding or destroying food supplies?  
Select all that apply.

- barriers around fields
- barriers on individual trees
- fire
- poison
- traps
- shooting
- loud sounds
- domestic/guardian animals
- flooding
- chasing animals out
- nothing

example Only do not use in field

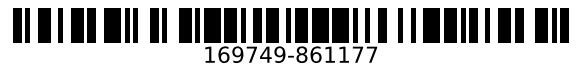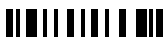

Supplement: Supplementary file 2 [file 90ffc9423a07da19c401f3c7.pdf]
